# Supplementary material
Source: HighWire-hosted journal article supplement (https://erj.ersjournals.com/content/61/1/2200970)

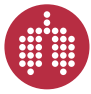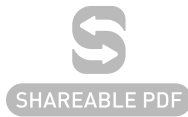

# Circulating anti-nuclear autoantibodies in COVID-19 survivors predict long COVID symptoms

Kiho Son<sup>1</sup>, Rameen Jamil<sup>1</sup>, Abhiroop Chowdhury<sup>2,6</sup>, Manan Mukherjee<sup>2,6</sup>, Carmen Venegas<sup>1</sup>, Kate Miyasaki<sup>1</sup>, Kayla Zhang<sup>1</sup>, Zil Patel<sup>1</sup>, Brittany Salter<sup>1</sup>, Agnes Che Yan Yuen<sup>3</sup>, Kevin Soon-Keen Lau<sup>3</sup>, Braeden Cowbrough<sup>1</sup>, Katherine Radford<sup>4</sup>, Chynna Huang<sup>4</sup>, Melanie Kjarsgaard<sup>4</sup>, Anna Dvorkin-Gheva<sup>1</sup>, James Smith<sup>1</sup>, Quan-Zhen Li<sup>5</sup>, Susan Wasserman<sup>1</sup>, Christopher J. Ryerson<sup>3</sup>, Parameswaran Nair<sup>1</sup>, Terence Ho<sup>1</sup>, Narayanaswamy Balakrishnan<sup>2</sup>, Ishac Nazy<sup>1</sup>, Dawn M.E. Bowdish<sup>1,4</sup>, Sarah Svenningsen<sup>1</sup>, Chris Carlsten<sup>3</sup> and Manali Mukherjee<sup>1</sup>

<sup>1</sup>Department of Medicine, McMaster University, Hamilton, ON, Canada. <sup>2</sup>Department of Mathematics and Statistics, McMaster University, Hamilton, ON, Canada. <sup>3</sup>Department of Medicine and Centre for Heart Lung Innovation, University of British Columbia, Vancouver, BC, Canada. <sup>4</sup>Firestone Institute for Respiratory Health, The Research Institute of St Joes, St Joseph's Healthcare Hamilton, Hamilton, ON, Canada. <sup>5</sup>Department of Immunology and Internal Medicine, University of Texas Southwestern Medical Center, Dallas, TX, USA. <sup>6</sup>Equal contribution.

Corresponding author: Manali Mukherjee ([mukherj@mcmaster.ca](mailto:mukherj@mcmaster.ca))

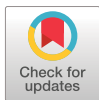

Shareable abstract (@ERSpublications)

**Circulating antinuclear autoantibodies were detected in COVID-19 patients up to 12 months post-recovery. The presence of these autoantibodies was associated with persisting symptoms and residual inflammation.** <https://bit.ly/3AduU02>

**Cite this article as:** Son K, Jamil R, Chowdhury A, *et al.* Circulating anti-nuclear autoantibodies in COVID-19 survivors predict long COVID symptoms. *Eur Respir J* 2023; 61: 2200970 [DOI: 10.1183/13993003.00970-2022].

This single-page version can be shared freely online.

Copyright ©The authors 2023.

This version is distributed under the terms of the Creative Commons Attribution Non-Commercial Licence 4.0. For commercial reproduction rights and permissions contact [permissions@ersnet.org](mailto:permissions@ersnet.org)

This article has an editorial commentary: <https://doi.org/10.1183/13993003.02272-2022>

Received: 10 May 2022  
Accepted: 4 Aug 2022

## Abstract

**Background** Autoimmunity has been reported in patients with severe coronavirus disease 2019 (COVID-19). We investigated whether anti-nuclear/extractable-nuclear antibodies (ANAs/ENAs) were present up to a year after infection, and if they were associated with the development of clinically relevant post-acute sequelae of COVID-19 (PASC) symptoms.

**Methods** A rapid-assessment line immunoassay was used to measure circulating levels of ANAs/ENAs in 106 convalescent COVID-19 patients with varying acute phase severities at 3, 6 and 12 months post-recovery. Patient-reported fatigue, cough and dyspnoea were recorded at each time point. Multivariable logistic regression model and receiver operating curves were used to test the association of autoantibodies with patient-reported outcomes and pro-inflammatory cytokines.

**Results** Compared to age- and sex-matched healthy controls (n=22) and those who had other respiratory infections (n=34), patients with COVID-19 had higher detectable ANAs at 3 months post-recovery (p<0.001). The mean number of ANA autoreactivities per individual decreased between 3 and 12 months (from 3.99 to 1.55) with persistent positive titres associated with fatigue, dyspnoea and cough severity. Antibodies to U1-snRNP and anti-SS-B/La were both positively associated with persistent symptoms of fatigue (p<0.028, area under the curve (AUC) 0.86) and dyspnoea (p<0.003, AUC=0.81). Pro-inflammatory cytokines such as tumour necrosis factor (TNF)- $\alpha$  and C-reactive protein predicted the elevated ANAs at 12 months. TNF- $\alpha$ , D-dimer and interleukin-1 $\beta$  had the strongest association with symptoms at 12 months. Regression analysis showed that TNF- $\alpha$  predicted fatigue ( $\beta$ =4.65, p=0.004) and general symptomatology ( $\beta$ =2.40, p=0.03) at 12 months.

**Interpretation** Persistently positive ANAs at 12 months post-COVID are associated with persisting symptoms and inflammation (TNF- $\alpha$ ) in a subset of COVID-19 survivors. This finding indicates the need for further investigation into the role of autoimmunity in PASC.

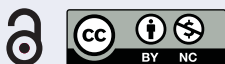

Supplement: inline-supplementary-material-2 [file inline-supplementary-material-2.pdf]
